# Supplementary material for: Translocation of CaMKII to dendritic microtubules supports the plasticity of local synapses
Source: PubMed Central journal article supplement — J Cell Biol. 2012 Sep 17;198(6):1055–73. doi: 10.1083/jcb.201202058 (PMC3444784; doi:10.1083/jcb.201202058), 2012-09-17
Supplement: supp_jcb.201202058_JCB_201202058_sm.pdf [file supp_jcb.201202058_JCB_201202058_sm.pdf]

Lemieux et al., <http://www.jcb.org/cgi/content/full/jcb.201202058/DC1>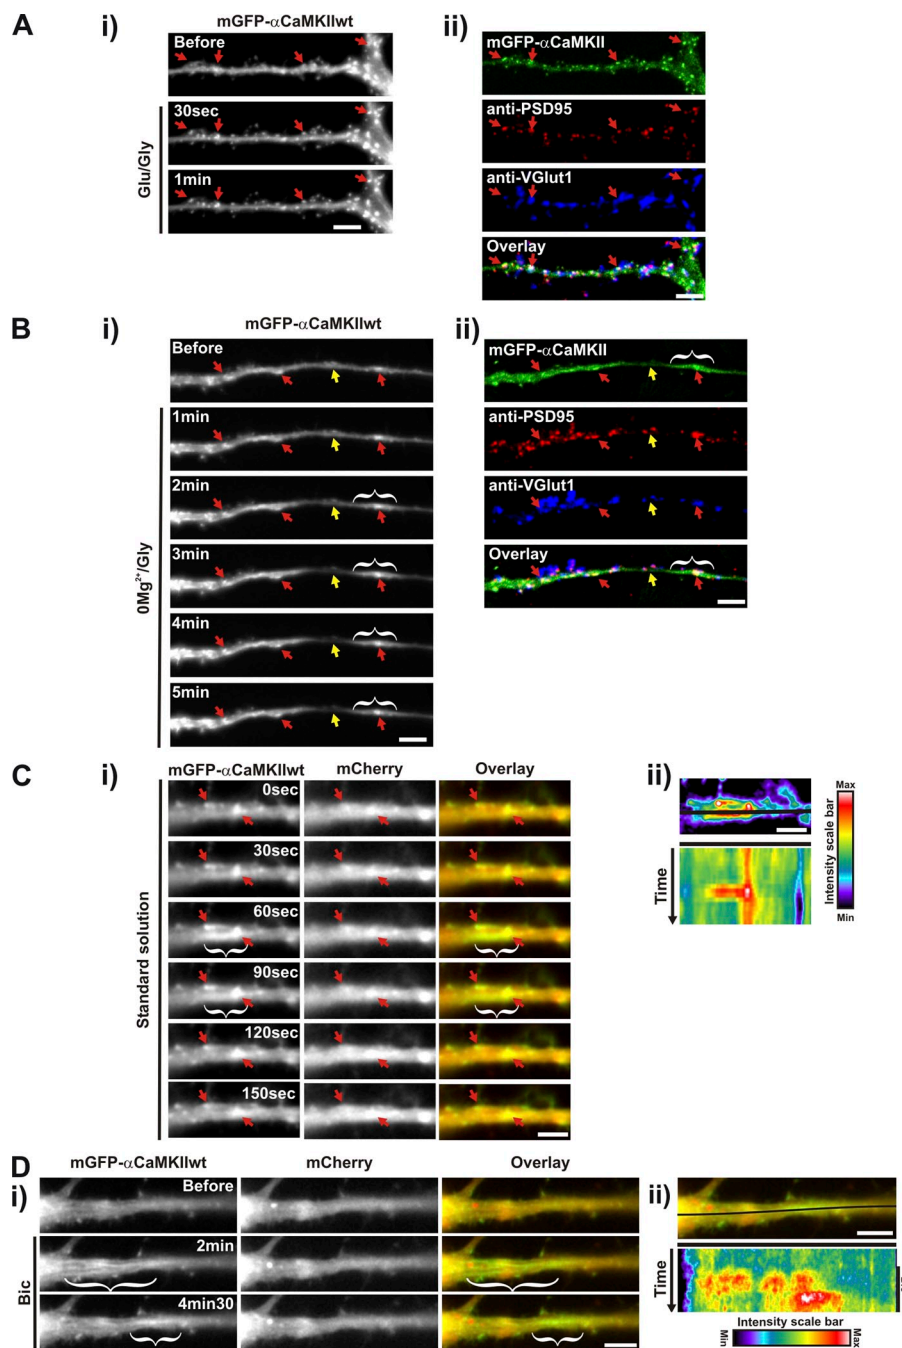

Figure S1. **Stimulated or spontaneous subdendritic translocation of CaMKII near excitatory synapses.** Ai and Bi) Time-lapse imaging of a dendrite expressing mGFP- $\alpha$ CaMKII WT during a 1-min stimulation with Glu/Gly (A) or a 5-min stimulation with 0Mg<sup>2+</sup>/Gly (B). (Aii and Bii) Same dendrite as in the i panels, fixed after the stimulation and immunolabeled for PSD95 and VGlut1. (Ci and Di) Time-lapse imaging of a dendrite expressing mGFP- $\alpha$ CaMKII WT and mCherry in standard solution (C), showing spontaneous dendritic translocation of the enzyme, and during application of 10  $\mu$ M bicuculline (D). (Cii and Dii) Kymograph of the change in the ratio of fluorescence (mGFP- $\alpha$ CaMKII/mCherry) over time across the dendrite (black line). Stimulation period in Dii is indicated [Bic]. Arrows point to synapses where CaMKII accumulated (red) or not (yellow). Brackets indicate regions of dendritic CaMKII hot spot. Bars: (A, B, and D) 5  $\mu$ m; (C) 2  $\mu$ m. Related to Fig. 1. See also Video 2.

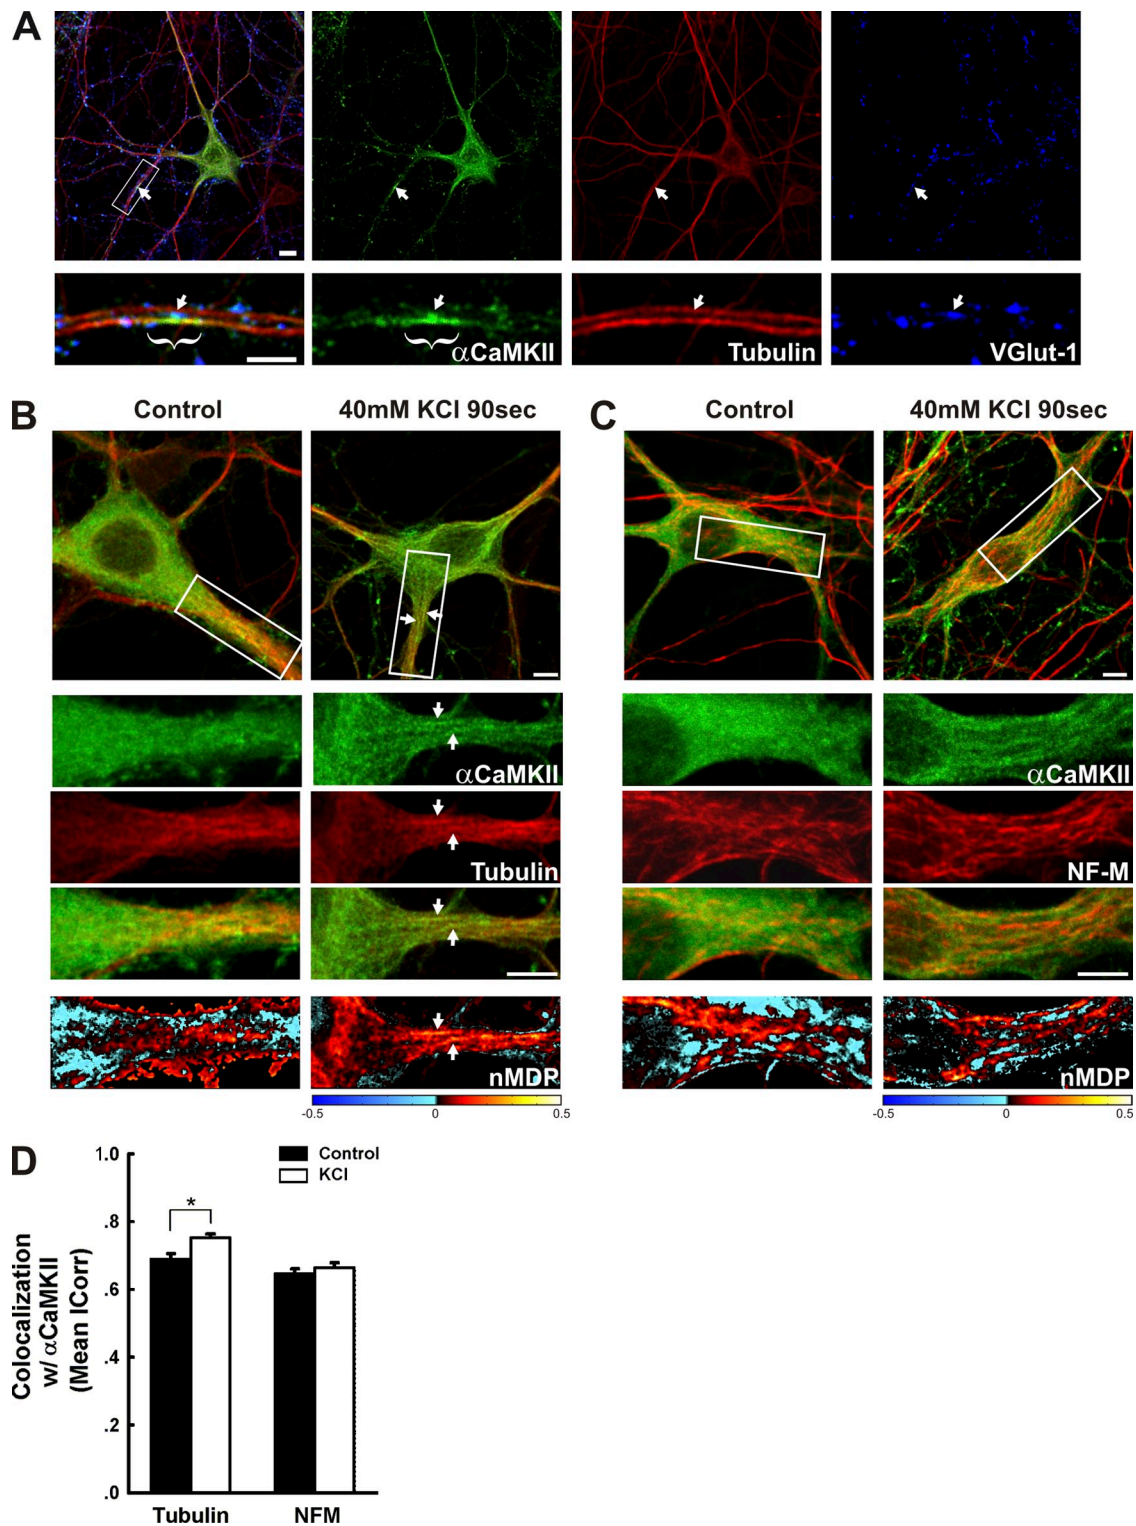

Figure S2. **Localization of endogenous  $\alpha$ CaMKII to microtubules in stimulated neurons.** (A) Immunostaining for endogenous  $\alpha$ CaMKII, tubulin, and VGLut1 in neurons stimulated with  $0Mg^{2+}/Gly$  for 5 min. Arrows point to a synapse where CaMKII accumulated. Brackets show a region of dendritic CaMKII hot spot. Bars: (neurons) 10  $\mu m$ ; (dendrites) 5  $\mu m$ . (B) Immunostaining on neurons for  $\alpha$ CaMKII and microtubules (tubulin). The bottom panels show a correlation-based colocalization analysis (see Materials and methods) of the above cropped images. (C) Control and stimulated neurons stained for endogenous  $\alpha$ CaMKII and neurofilament-M (NF-M). Neurons were stimulated with 40 mM KCl for 90 s. nMDP images represent the correlation between the two signals in pseudocolor, hotter color (positive nMDP values) meaning more correlation. Bar, 5  $\mu m$ . (D) Mean  $\pm$  SEM  $I_{corr}$  (image correlation) between  $\alpha$ CaMKII and tubulin, and between  $\alpha$ CaMKII and neurofilament-M, after KCl stimulation.  $n = 40$  neurons per condition, two experiments. \*,  $P < 0.05$  ANOVA followed by a Tukey's least-significant difference test. Related to Figs. 1 and 3.

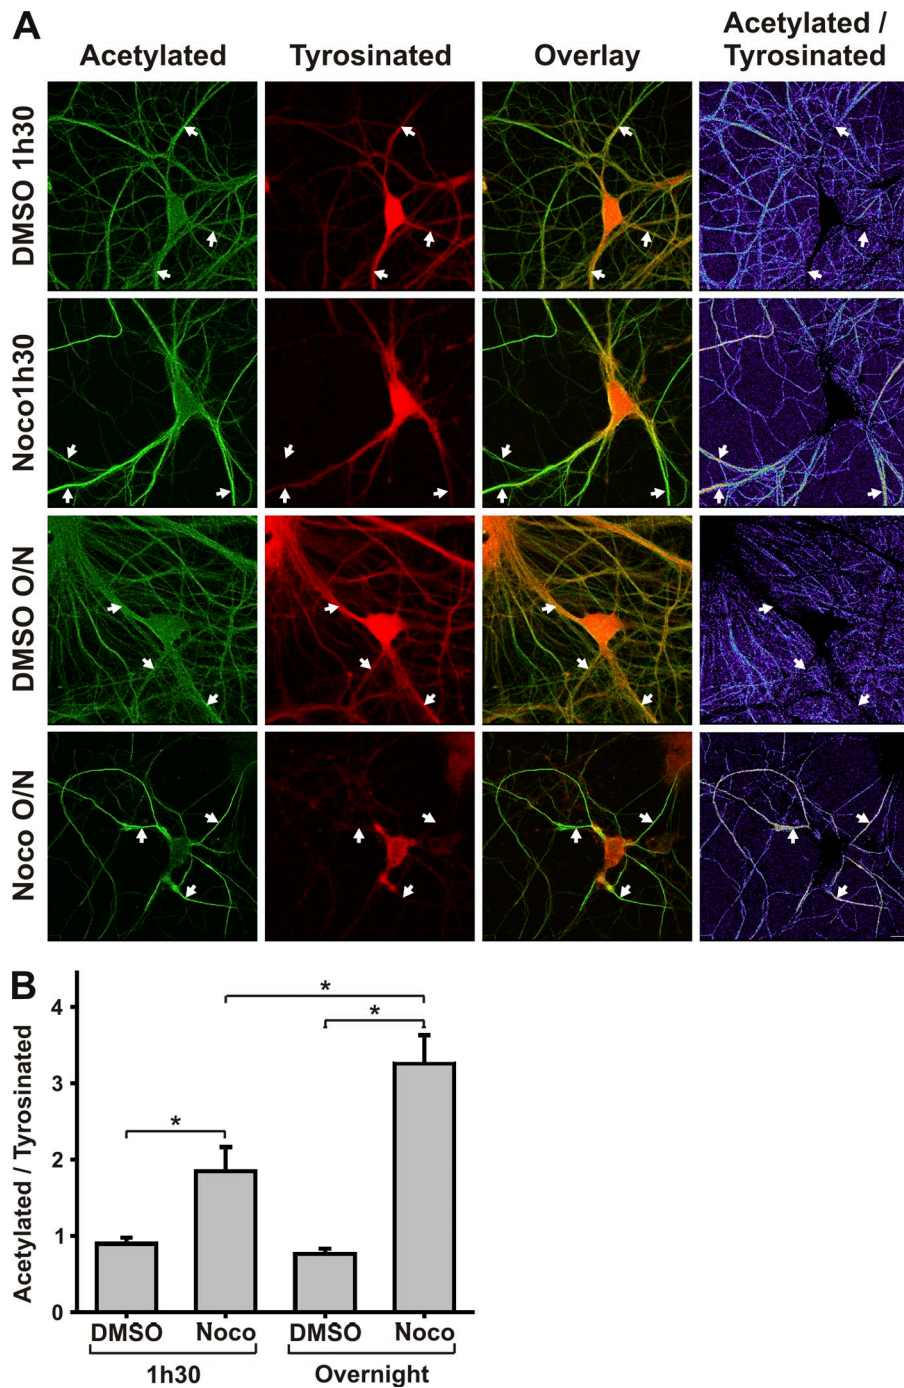

Figure S3. **Effect of nocodazole on microtubule destabilization assessed by measuring changes in ratio of acetylated/tyrosinated tubulin.** (A) Immunostaining for acetylated (more stable microtubules) and tyrosinated (more dynamic microtubules) tubulin in neurons treated for 90 min or overnight (16–24 h) with 10  $\mu$ M nocodazole or 0.1% DMSO. Pseudocolored images of the right panels are the ratio of the images of acetylated tubulin over tyrosinated tubulin. Bar, 10  $\mu$ m. (B) Mean  $\pm$  SEM of the intensity ratio in dendritic regions of immunolabeled acetylated over tyrosinated tubulin.  $n = 10$ –20 neurons per condition. \*,  $P < 0.05$  Kruskal Wallis followed by a Tukey's least-significant difference test. These results demonstrate that incubation of nocodazole over 90 min causes only partial destabilization of microtubules. After overnight treatment, the morphology of the neurons was strongly affected. Related to Fig. 3. Based on Witte et al., 2008.

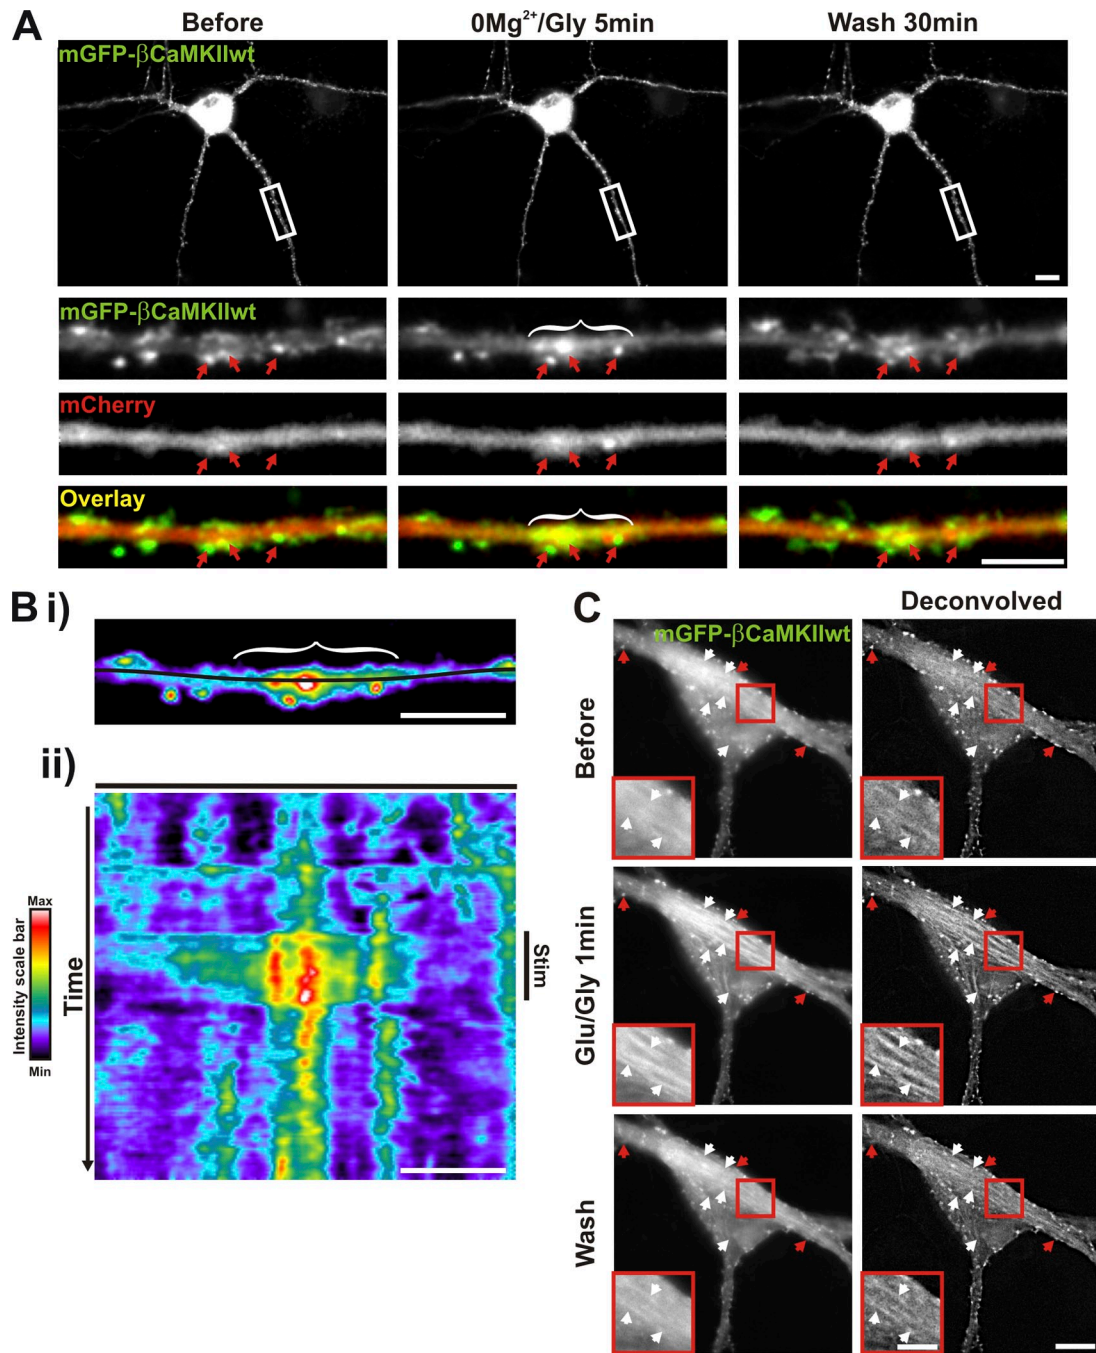

Figure S4. **Activity-dependent translocation of βCaMKII to microtubules.** (A) Neuron expressing mGFP-βCaMKII and mCherry stimulated with 0Mg<sup>2+</sup>/Gly for 5 min. Bars: (neuron) 10 μm; (dendrite) 5 μm. (B) Kymograph of the change in the ratio of fluorescence (mGFP-βCaMKII/mCherry) over time across the dendrite (black line). Stimulation is indicated (Stim). Bars, 5 μm. (C) Time-lapse imaging of mGFP-βCaMKII during a 1-min glutamate/glycine (100/10 μM) stimulation. Arrows point to synaptic (red) or microtubule-like sites (white) of CaMKII translocation. White brackets indicate a CaMKII dendritic hot spot. Bars: (neuron) 10 μm; (inset) 5 μm. Related to Figs. 1 and 3.

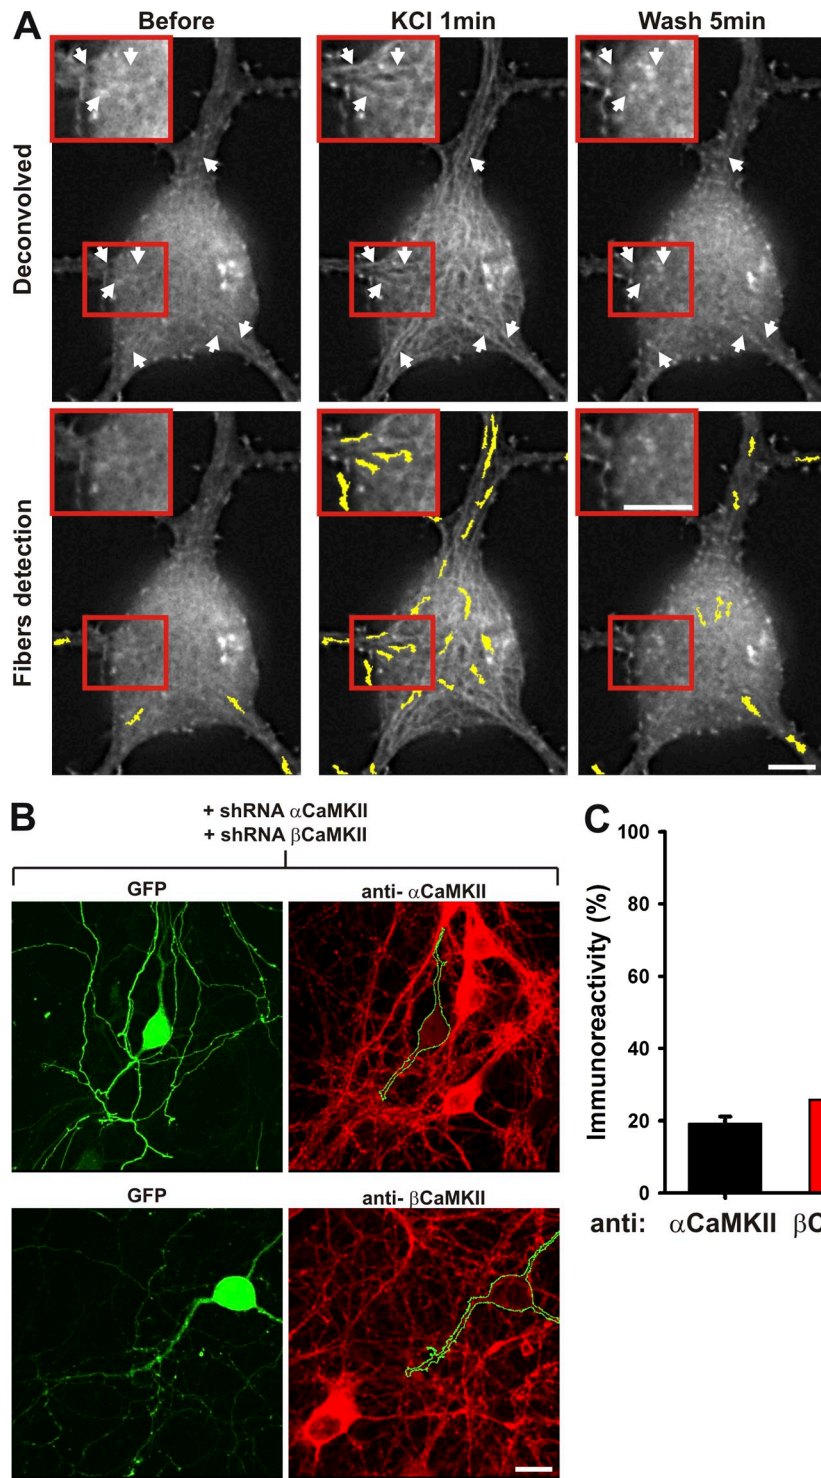

Figure S5. **Morphometric analysis of CaMKII translocation to microtubules and effect of shRNA treatment on endogenous level of  $\alpha$ - and  $\beta$ CaMKII.** (A) Deconvolved images of a cell body from a neuron transfected with mGFP- $\alpha$ CaMKII WT on which fibers were detected (yellow) before, during, and after a stimulation with KCl for 1 min. Arrows point to regions where fibers appear during the stimulation. (B) Neurons transfected with GFP and shRNA against both  $\alpha$ - and  $\beta$ CaMKII and immunolabeled for  $\alpha$ CaMKII (top) or  $\beta$ CaMKII (bottom). (C) Quantification of the percentage of immunoreactivity for  $\alpha$ - or  $\beta$ CaMKII in the transfected cell compared with neighbor neurons.  $n = 32$ – $34$  neurons per condition, 4 experiments. Bars: (A)  $5 \mu\text{m}$ ; (B)  $20 \mu\text{m}$ . Related to Figs. 3 and 4.

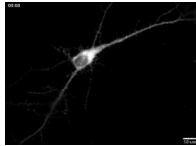

Video 1. **Translocation of  $\alpha$ CaMKII to dendritic sites near synapses.** Time-lapse imaging of a neuron expressing mGFP- $\alpha$ CaMKII stimulated with  $0\text{Mg}^{2+}/\text{Gly}$  for 5 min showing  $\alpha$ CaMKII translocation at some synaptic sites and the appearance of dendritic  $\alpha$ CaMKII hot spots. Frames were taken every 10 s for the first 13 min and then every 30 s with a CoolSnap-HQ camera (Photometrics) on an Axioskop FS2 microscope (Achromplan 63x 0.95 NA objective; Carl Zeiss). Related to Fig. 1.

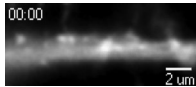

Video 2. **Spontaneous translocation of  $\alpha$ CaMKII to dendritic sites near synapses.** Time-lapse imaging of a neuron expressing mGFP- $\alpha$ CaMKII in standard solution showing spontaneous  $\alpha$ CaMKII translocation at two synaptic sites and the appearance of dendritic  $\alpha$ CaMKII fiber-like structure nearby. Frames were taken every 30 s with a CoolSnap-HQ camera (Photometrics) on an Axioskop FS2 microscope (Achromplan 63x 0.95 NA objective; Carl Zeiss). Related to Fig. 1 and Fig. S1.

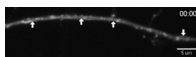

Video 3. **Repetitive translocation of  $\alpha$ CaMKII to dendritic sites near synapses.** Time-lapse imaging of a neuron expressing mGFP- $\alpha$ CaMKII showing repetitive accumulation of CaMKII in dendritic hot spots near synapses during multiple  $0\text{Mg}^{2+}/\text{Gly}$  stimulations (3–5 min each). Frames were taken every 20 s with a CoolSnap-HQ camera (Photometrics) on an Axioskop FS2 microscope (Achromplan 63x 0.95 NA objective; Carl Zeiss). Related to Fig. 1.

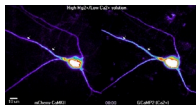

Video 4.  **$\alpha$ CaMKII translocates to dendritic sites of higher  $\text{Ca}^{2+}$  concentration.** Time-lapse imaging of a neuron expressing both mCherry- $\alpha$ CaMKII (left) and GCaMP2 (right), a genetically encoded  $\text{Ca}^{2+}$  indicator, and stimulated with  $0\text{Mg}^{2+}/\text{Gly}$  for 5 min.  $\text{Ca}^{2+}$  oscillations during the stimulation lead to the gradual accumulation of mCherry- $\alpha$ CaMKII at sites where  $\text{Ca}^{2+}$  amplitude and/or frequency are higher (examples are pointed by the arrows). Frames were taken every 2 s with a QuantEM:512SC camera (Photometrics) on an Axioskop FS2 microscope (Achromplan 63x 0.95 NA objective; Carl Zeiss). Related to Fig. 2.

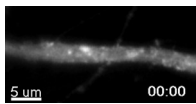

Video 5.  **$\alpha$ CaMKII accumulates in dendritic segments by interacting with microtubular elements.** Time-lapse imaging of a dendrite from a neuron expressing mGFP- $\alpha$ CaMKII and stimulated with  $0\text{Mg}^{2+}/\text{Gly}$  for 5 min. During the stimulation, mGFP- $\alpha$ CaMKII translocates to a synapse and gradually accumulates in the dendritic segments near this synaptic site, revealing a microtubular-like pattern of fluorescence in the dendrite. This is accompanied by a reversible decrease in the amount of mGFP- $\alpha$ CaMKII on each side of this region. Frames were taken every 10 s for the first 8 min and then every 30 s with a CoolSnap-HQ camera (Photometrics) on an Axioskop FS2 microscope (Achromplan 63x 0.95 NA objective; Carl Zeiss). Related to Fig. 3.

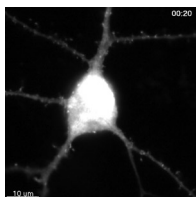

Video 6. **Cell-wide depolarization induces  $\alpha$ CaMKII translocation to microtubular elements throughout the neuron.** Time-lapse imaging of a neuron expressing mGFP- $\alpha$ CaMKII stimulated with 40 mM KCl for 1 min. During the stimulation, mGFP- $\alpha$ CaMKII translocates to synapses throughout the neuron, but also to microtubules in the somatodendritic area. Frames were taken every 10 s for the first 4 min and then every 30 s with a CoolSnap-HQ camera (Photometrics) on an Axioskop FS2 microscope (Achromplan 63x 0.95 NA objective; Carl Zeiss). Related to Fig. 3.

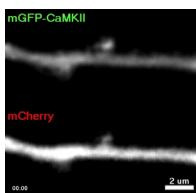

Video 7. **Localized dendritic translocation of  $\alpha$ CaMKII correlates with spine growth.** Time-lapse imaging of mGFP- $\alpha$ CaMKII (top) and mCherry (down) in a spine and subjacent dendrite stimulated with  $0\text{Mg}^{2+}/\text{Gly}$  for 5 min. During the stimulation, mGFP- $\alpha$ CaMKII first accumulates into the spine and then in the dendritic segment at its base. The spine gradually grows and its increase in size persists 30 min after the stimulation. Frames were taken every 10 s for the first 8 min and then every 30 s with a CoolSnap-HQ camera (Photometrics) on an Axioskop FS2 microscope (Achromplan 63x 0.95 NA objective; Carl Zeiss). Related to Fig. 7.

## Reference

Witte, H., D. Neukirchen, and F. Bradke. 2008. Microtubule stabilization specifies initial neuronal polarization. *J. Cell Biol.* 180:619–632. <http://dx.doi.org/10.1083/jcb.200707042>
